# Supplementary material for: Design, implementation and usability analysis of patient empowerment in ADLIFE project via patient reported outcome measures and shared decision making
Source: BMC Med Inform Decis Mak. 2024 Jun 28;24:185. doi: 10.1186/s12911-024-02588-y (PMC11212241; doi:10.1186/s12911-024-02588-y)
Supplement: Supplementary file 10 — Additional file 10. [file 12911_2024_2588_MOESM10_ESM.xlsx]

## Sheet: Legend
Additional File 10
a. File format: .xlsx
b. Title: ADLIFE_QUIS7_PEP_July2022
c. Description of Data: QUIS7 usability questionnaire responses for patients and their informal caregivers for the two site groups: Germany+Spain; UK-England
ßßß

## Sheet: info
Tab	Action	Comment
GB-EN_STAT	Count, Mean, Median, SD for the GB-England site. GB-ENG site separate as PPI approach used and participants did not test the system themselves.	Use for the England site stats in each category
DE+ES_STAT	Count, Mean, Median, SD for the German and Spanish sites - they are considered together as the participants have tested the system themselves.	Use for the German + Spanish sites stats in each category

## Sheet: DE+ES_STAT
Study ID		P1	P2	P3	P4	P5	P6	P7	P8
UserLanguage	User Language	DE	DE	DE	ES-ES	ES-ES	ES-ES	ES-ES	ES-ES	Count	Mean	SD	Median
Q1.1	1.1 Do you have a chronic condition or do you care for someone who does?	1	1	1	2	2	1	1	2	8
Q2.1	2.1 I find the ADLIFE system	9	6	9	6	8	7	2	7	8	6.75	2.25198	7
Q2.2	2.2 I find the ADLIFE system	7			6	9	7	1		5	6	3	7
Q2.3	2.3 I find the ADLIFE system	8	6		5	8	7	9	7	7	7.14286	1.34519	7
Q2.4	2.4 I find the ADLIFE system	8			6	9	6	9		5	7.6	1.51658	8
Q2.5	2.5 I find the ADLIFE system (Clarification: the system allows all the functions required by the user to be carried out)	9	5	8	6	7	6	1	6	8	6	2.39046	6
Q2.6	2.6 I find the ADLIFE system	7	5	9	6	8	6	9	7	8	7.125	1.45774	7
											6.76964
Q3.1	3.1 The characters on the computer screen are	9	9	8	9	9		9	7	7	8.57143	0.786796	9
Q3.1.1	3.1.1 The image of characters is	9	9		9	9		9	8	6	8.83333	0.408248	9
Q3.2	3.2 The highlighting on the screen is	7	9	8	7	9		9	7	7	8	1	8
Q3.2.1	3.2.1 The use of bolding is	8	3		9	9		9		5	7.6	2.60768	9
Q3.3	3.3 The screen layouts were helpful	9	6	8	9	8		5	7	7	7.42857	1.51186	8
Q3.3.1	3.3.1 The amount of information that can be displayed on screen is	6	2		9	9		9		5	7	3.08221	9
Q3.3.2	3.3.2 The arrangement of information on screen is	9	5	8	9	9		9	7	7	8	1.52753	9
Q3.4	3.4 The sequence of screens is		6		9	9		9		4	8.25	1.5	9
Q3.4.1	3.4.1 The next screen in a sequence is	7	5	8	9	9		5	7	7	7.14286	1.67616	7
Q3.4.2	3.4.2 Going back to the previous screen is	9	9	6	9	9				5	8.4	1.34164	9
Q3.4.3	3.4.3 Progression of tasks is	6	3	8	6	9			7	6	6.5	2.07364	6.5
Q3Comment	Please write your comments about the screens here		Leider kann man noch zu wenige Fragen beantworten daher kann ich kein Urteil abgeben	De Button müssen die geforderten Leistungen umsetzen können		Resaltaría con algún color o con un texto claro qué pantalla tiene que cumplimentar el paciente o en su caso el cuidador desde que se abre la aplicación, también recordaría qué no se ha rellenado para que sea más fácil terminar de cumplimentar todas las preguntas sabiendo que lo has hecho bien y que no has dejado nada sin rellenar.		Solo se me conecto 2 veces, a partir de hay dolo puedo valorar lo que vi en la reunion,la conexion es muy inestable,por lo demas me parece muy bien		4
Q3Comment_EN	Please write your comments about the screens here		Unfortunately, there are still too few questions to answer, so I cannot give a verdict.	The button must be able to implement the required services		I would highlight in colour or with clear text which screen the patient or caregiver has to fill in from the moment the application is opened, I would also remember what has not been filled in so that it is easier to finish filling in all the questions knowing that you have done it right and that you have not left anything out.		I was only connected 2 times, from then on I can only evaluate what I saw in the meeting, the connection is very unstable, otherwise I think it is very good.		4
											7.79329
Q4.1	4.1 The use of terminology throughout system is	9	7	8	6	9				5	7.8	1.30384	8
Q4.2	4.2 The terminology relates well to the activity I am doing	9	5		6	8		9		5	7.4	1.81659	8
Q4.2.1	4.2.1 Computer terminology is used	5	8	9	6	9		9		6	7.66667	1.75119	8.5
Q4.2.2	4.2.2 Terminology on the screen is	7	7	9	6	8		9		6	7.66667	1.21106	7.5
Q4.3	4.3 Messages that appear on screen are	5	7		6	8		9		5	7	1.58114	7
Q4.3.1	4.3.1 The position of instructions on the screen is	6	8	9	6	8		6		6	7.16667	1.32916	7
Q4.4	4.4 Messages that appear on screen are		6	9	6	9		9		5	7.8	1.64317	9
Q4.4.1	4.4.1 Instructions for commands or functions are		7	9	6	8		9		5	7.8	1.30384	8
Q4.4.2	4.4.2 Instructions for correcting errors are		1	9	6	9				4	6.25	3.77492	7.5
Q4.5	4.5 The computer keeps me informed about what it is doing		2	8	6	8				4	6	2.82843	7
Q4.5.1	4.5.1 Animated cursors (different mouse pointer shapes) keep me informed		2	8	6	8				4	6	2.82843	7
Q4.5.2	4.5.2 Performing an operation leads to a predictable result		8	8	6	8				4	7.5	1	8
Q4.5.3	4.5.3 Controlling the amount of feedback is		2	8	6	8				4	6	2.82843	7
Q4.5.4	4.5.4 The length of delay between operations is	6	8	9	9	8				5	8	1.22474	8
Q4.6	4.6 Error messages are			7	7	9				3	7.66667	1.1547	7
Q4.6.1	4.6.1 Error messages clarify the problem			7	6	7				3	6.66667	0.57735	7
Q4.6.2	4.6.2 Phrasing of error messages is			7	7	8				3	7.33333	0.57735	7
Q4Comments	Please write your comments about terminology and system information here					En este periodo de prueba aparecían comentarios de error pero me imagino que sería porque la app estaba en modo prueba...				1
Q4Comments_EN	Please write your comments about terminology and system information here					In this test period there were some error comments but I guess it was because the app was in test mode…				1
											7.1598
Q5.1	5.1 Learning to operate the system is	9	8	9	9	9				5	8.8	0.447214	9
Q5.1.1	5.1.1 Getting started is	9		9	9	8				4	8.75	0.5	9
Q5.1.2	5.1.2 Time to learn to use the system is	9	7	9	9	7				5	8.2	1.09545	9
Q5.2	5.2 Exploration of features by trial and error is	9		9	9	7				4	8.5	1	9
Q5.3	5.3 Remembering menu options and steps in the workflow is	7	8	9	9	9				5	8.4	0.894427	9
Q5.4	5.4 The number of steps per task is		8	9	9	9				4	8.75	0.5	9
Q5.5	5.5 Feedback on the completion of sequence of steps is		7	8	9	5				4	7.25	1.70783	7.5
Q5Comment	Please write your comments about learning here		Man kann leider noch nicht viel erarbeiten			Me parece que resultará más fácil el uso cuando se introduzcan datos reales y la app esté diseñada para el paciente en concreto.				2
Q5Comment_EN	Please write your comments about learning here		Unfortunately, you can't work out much yet			I think it will be easier to use when real data is entered and the app is designed for the specific patient.				2
											8.37857
Q6.1	6.1 Quality of still pictures/photographs is			8	7	9				3	8	1	8
Q6.1.1	6.1.1 Pictures/Photos are				7	7				2	7	0	7
Q6.1.2	6.1.2 Picture/Photo brightness is			8	7	7				3	7.33333	0.57735	7
Q6.2	6.2 Colors used are			8	9	9				3	8.66667	0.57735	9
Q6.2.1	6.2.1 Amount of colors available is			8	7	9				3	8	1	8
Q6Comment	Please write your comments about multimedia here					Son correctos, relacionado con un comentario anterior sería práctico resaltar el apartado donde hay que introducir los datos con un color o fotografía que facilite el acceso directo sin confusión.				1
Q6Comment_EN	Please write your comments about multimedia here					They are correct, related to a previous comment it would be practical to highlight the section where the data has to be entered with a colour or photograph to facilitate direct access without confusion.				1
											7.8
Q7.1	7.1 The training workshop or training video was			9	8	9				3	8.66667	0.57735	9
Q7.2	7.2 The terminology used in the manual is		9	9	6	9				4	8.25	1.5	9
Q7.3	7.3 The information from the manual is easily understood		9	9	6	9				4	8.25	1.5	9
Q7.4	7.4 Finding a solution to a problem using the manual is			9	6	9				3	8	1.73205	9
Q7.5	7.5 Amount of help given is			8	6	9				3	7.66667	1.52753	8
Q7.6	7.6 Placement of help messages on the screen is		2	9	6	6				4	5.75	2.87228	6
Q7.7	7.7 Accessing help messages is		1	9	6	7				4	5.75	3.40343	6.5
Q7Comment	Please write your comments about training material here					Son adecuados				1
Q7Comment_EN	Please write your comments about training material here					They are suitable				1
											7.47619
Q8.1	8.1 System speed is	8		9	9	9				4	8.75	0.5	9
Q8.1.1	8.1.1 Response time for most operations is	8		9	9	9				4	8.75	0.5	9
Q8.2	8.2 The system is reliable			9	5	7				3	7	2	7
Q8.2.1	8.2.1 System failures occur			9	5	6		1		4	5.25	3.30404	5.5
Q8.2.2	8.2.2 The system warns you about potential problems			9	5	9				3	7.66667	2.3094	9
Q8.3	8.3 Correcting your mistakes is		9	9	4	9				4	7.75	2.5	9
Q8.3.1	8.3.1 Correcting typos is			9	5	9				3	7.66667	2.3094	9
Q8.3.2	8.3.2 Ability to undo operations is		9	9	5	8				4	7.75	1.89297	8.5
Q8.4	8.4 The ease of operation depends on my level of experience	7	9	9	5	9				5	7.8	1.78885	9
Q8.4.1	8.4.1 I can accomplish tasks knowing only a few commands	9	8	9	5	9				5	8	1.73205	9
Q8Comment	Please write your comments about system capabilities here					Se ve que es muy completo pero es verdad que en periodo de prueba no se puede sacar conclusiones muy decisivas.				1
Q8Comment_EN	Please write your comments about system capabilities here					It seems to be very complete, but it is true that in a trial period it is not possible to draw very decisive conclusions.				1
											7.63833
Q9	9. Your opinion matters. Please leave either a general or a specific comment below if you would like to. If you are concerned about certain sections, just mention their number as a reference point.		Leider kann an noch nicht viele Aufgaben ausfüllen, daher kann ich kein Urteil abgeben, finde das Programm aber sehr interessant	Das Programm wird wenn alle Buttons funktionieren sehr gut sein	Existen funcionalidades que no estaban desarrolladas. El sistema, debería ser integrado en la carpeta sanitaria.	Pienso que será difícil por parte del profesional tener actualizada la posología de la medicación. Si se logra eso la aplicación ganaría mucho. También servirá para aparte de la medicación fomenatr tareas diversas a realizar por el paciente, hábitos saludables, etc... A largo plazo veo que será una buena herramienta pero relacionado con el seguimiento del paciente me pregunto ¿saltarán alarmas en…		Me fue imposible conocer su funcionamiento solo conoci su estetica		6
Q9_EN	9. Your opinion matters. Please leave either a general or a specific comment below if you would like to. If you are concerned about certain sections, just mention their number as a reference point.		Unfortunately, I can't complete many tasks yet, so I can't give a verdict, but I find the programme very interesting.	The programme will be very good when all the buttons are working	There are functionalities that were not developed. The system should be integrated into the health folder.	I think it will be difficult for the practitioner to keep the dosage of the medication up to date. If this could be achieved, the application would gain a lot. It will also serve to promote, apart from medication, various tasks to be carried out by the patient, healthy habits, etc.... In the long term I see that it will be a good tool but related to patient monitoring, I wonder if the professiona…		It was impossible for me to know how it works, I only got to know its aesthetics.		6

## Sheet: GB_EN_STAT
Study ID		P9	P10	P11	P12	P13	P14	P15	P16	P17	P18
UserLanguage	User Language	EN-GB	EN-GB	EN-GB	EN-GB	EN-GB	EN-GB	EN-GB	EN-GB	EN-GB	EN-GB	count	mean	sd	median
Q1.1	1.1 Do you have a chronic condition or do you care for someone who does?	2		1	2	2	2	2	1	2	1	9
Q2.1	2.1 I find the ADLIFE system	5		6	5	5	7	6	6	5	8	9	5.88889	1.05409	6
Q2.2	2.2 I find the ADLIFE system	4		6	6	6	6	4	5	5	7	9	5.44444	1.01379	6
Q2.3	2.3 I find the ADLIFE system	4		5	6	4	8	6	5	5	7	9	5.55556	1.33333	5
Q2.4	2.4 I find the ADLIFE system	4		7	7	8	8	3	5	6	8	9	6.22222	1.85592	7
Q2.5	2.5 I find the ADLIFE system (Clarification: the system allows all the functions required by the user to be carried out)	9		5	7	5	8	5	5	6	8	9	6.44444	1.5899	6
Q2.6	2.6 I find the ADLIFE system		2	6	9	8	9	7	5	6	7	9	6.55556	2.18581	7
													6.01852
Q3.1	3.1 The characters on the computer screen are			6	7	6	2	4	4	6	8	8	5.375	1.92261	6
Q3.1.1	3.1.1 The image of characters is			7	7	2	5	6	5	7	9	8	6	2.0702	6.5
Q3.2	3.2 The highlighting on the screen is					2	5	5	4	6	9	6	5.16667	2.31661	5
Q3.2.1	3.2.1 The use of bolding is				8	7	5	3	4	6	8	7	5.85714	1.9518	6
Q3.3	3.3 The screen layouts were helpful			6	7	7	5	7	4	6	8	8	6.25	1.28174	6.5
Q3.3.1	3.3.1 The amount of information that can be displayed on screen is	5		7	9	7	5	7	5	6	8	9	6.55556	1.424	7
Q3.3.2	3.3.2 The arrangement of information on screen is			6	9	7	5	7	5	6	7	8	6.5	1.30931	6.5
Q3.4	3.4 The sequence of screens is	6		6	9	7	5	4	5	5	8	9	6.11111	1.61589	6
Q3.4.1	3.4.1 The next screen in a sequence is			6	9	5	5	5	5	5	7	8	5.875	1.45774	5
Q3.4.2	3.4.2 Going back to the previous screen is			5	9		5	7	5	6	9	7	6.57143	1.81265	6
Q3.4.3	3.4.3 Progression of tasks is	6		6	9	6	5	4	5	6	9	9	6.22222	1.71594	6
Q3Comment	Please write your comments about the screens here	I couldn't see them properly.			Too much information to absorb.	there are too many pages, too much information and text, for older adults i would want to see larger text, the terms used are not very patient friendly	I have not had the opportunity to see or use the online tool on a screen, having only the slides from the presentation. During the Teams meeting it was difficult to see how each screen would be viewed, as the text was very small. There was not an interactive demonstration of how the patient/user would interact with the screens. I cannot say that we had enough information of how each screen would …	I had only limited access (remotely on Video Conference only) on a video recording by the presenter on what the system can (or will) do, so my answers above are only based on limited view and understanding of the system. I therefore do not believe questions asked in this questionnaire are relevant and appropriate for me to answer them fully but I hope my feedback will of some help on how the syst…	Screens can be a little confusing - I don't know what happens when I need to leave the screen I am on and return later? Do I need to start from the beginning again?		Good.	7
Q3Comment_EN	Please write your comments about the screens here	I couldn't see them properly.			Too much information to absorb.	there are too many pages, too much information and text, for older adults i would want to see larger text, the terms used are not very patient friendly	I have not had the opportunity to see or use the online tool on a screen, having only the slides from the presentation. During the Teams meeting it was difficult to see how each screen would be viewed, as the text was very small. There was not an interactive demonstration of how the patient/user would interact with the screens. I cannot say that we had enough information of how each screen would …	I had only limited access (remotely on Video Conference only) on a video recording by the presenter on what the system can (or will) do, so my answers above are only based on limited view and understanding of the system. I therefore do not believe questions asked in this questionnaire are relevant and appropriate for me to answer them fully but I hope my feedback will of some help on how the syst…	Screens can be a little confusing - I don't know what happens when I need to leave the screen I am on and return later? Do I need to start from the beginning again?		Good.	7
													6.04401
Q4.1	4.1 The use of terminology throughout system is	6		4	6	7	7	5	5	6	9	9	6.11111	1.45297	6
Q4.2	4.2 The terminology relates well to the activity I am doing			6	6	3		6	5	6	8	7	5.71429	1.49603	6
Q4.2.1	4.2.1 Computer terminology is used	6		6		1	6	6	5	4	9	8	5.375	2.26385	6
Q4.2.2	4.2.2 Terminology on the screen is	6		7	9	3	5	4	5	5	8	9	5.77778	1.92209	5
Q4.3	4.3 Messages that appear on screen are			7	9	4		6	5		8	6	6.5	1.87083	6.5
Q4.3.1	4.3.1 The position of instructions on the screen is			7		7	5	7	5	6	8	7	6.42857	1.13389	7
Q4.4	4.4 Messages that appear on screen are	7			7	4	5	6	5		8	7	6	1.41421	6
Q4.4.1	4.4.1 Instructions for commands or functions are			7	5	3	5	6	5	5	9	8	5.625	1.76777	5
Q4.4.2	4.4.2 Instructions for correcting errors are			6			5	5	5	6		5	5.4	0.547723	5
Q4.5	4.5 The computer keeps me informed about what it is doing			7	6		5	5	5	6	9	7	6.14286	1.46385	6
Q4.5.1	4.5.1 Animated cursors (different mouse pointer shapes) keep me informed			7	6	5	5	6	5	6		7	5.71429	0.755929	6
Q4.5.2	4.5.2 Performing an operation leads to a predictable result			6	8	6	5	6	5			6	6	1.09545	6
Q4.5.3	4.5.3 Controlling the amount of feedback is			6	1	6	5	6	5	6	7	8	5.25	1.83225	6
Q4.5.4	4.5.4 The length of delay between operations is			7	8		5	7	5	7		6	6.5	1.22474	7
Q4.6	4.6 Error messages are			6			5	5	5	7		5	5.6	0.894427	5
Q4.6.1	4.6.1 Error messages clarify the problem			6			9		5	6		4	6.5	1.73205	6
Q4.6.2	4.6.2 Phrasing of error messages is			6			5		5	6		4	5.5	0.57735	5.5
Q4Comments	Please write your comments about terminology and system information here	I was at a virtual workshop and so could not go through the application myself.			Relavantly easy to understand	the system is riddled with technical terms including IT and computer, such as 'data', 'tool' etc	I do not feel I have had an adeqaute demonstration of the system to allow me to cooment credibly.The terminology, as far as I heard it, was fine.	My comments are based on the recorded presentation done and this was presented to me (and other attendees) at a video conference meeting where we were shown the capability of the system (who knew how to use the system) but I am not sure if I would be able to use the tool as effectively as the presenter, and understand the tasks or activities being requested of me to do.	Without being able to physically use the system it is difficult to comment - are trials available?		I don't feel able to comment authoritatively on a number of the questions so far as I only had one hour information about the software (online today).	7
Q4Comments_EN	Please write your comments about terminology and system information here	I was at a virtual workshop and so could not go through the application myself.			Relavantly easy to understand	the system is riddled with technical terms including IT and computer, such as 'data', 'tool' etc	I do not feel I have had an adeqaute demonstration of the system to allow me to cooment credibly.The terminology, as far as I heard it, was fine.	My comments are based on the recorded presentation done and this was presented to me (and other attendees) at a video conference meeting where we were shown the capability of the system (who knew how to use the system) but I am not sure if I would be able to use the tool as effectively as the presenter, and understand the tasks or activities being requested of me to do.	Without being able to physically use the system it is difficult to comment - are trials available?		I don't feel able to comment authoritatively on a number of the questions so far as I only had one hour information about the software (online today).	7
													5.89052
Q5.1	5.1 Learning to operate the system is	7		5	9	3		2	5	7	9	8	5.875	2.58775	6
Q5.1.1	5.1.1 Getting started is			4	7	6		2	5	6	9	7	5.57143	2.22539	6
Q5.1.2	5.1.2 Time to learn to use the system is			4	9	3			5	5	8	6	5.66667	2.33809	5
Q5.2	5.2 Exploration of features by trial and error is			5	9				5	6		4	6.25	1.89297	5.5
Q5.3	5.3 Remembering menu options and steps in the workflow is			5	9				5	5		4	6	2	5
Q5.4	5.4 The number of steps per task is			6	1	3		4	5	5		6	4	1.78885	4.5
Q5.5	5.5 Feedback on the completion of sequence of steps is			6	8			4	5	5		5	5.6	1.51658	5
Q5Comment	Please write your comments about learning here				The need to learn and retain knowledge is vital.	given the burden of health conditions and especially those that affect older adults such as copd and heart failure i would say that it is both too time consuming and perhaps unhealthy to encourage more sedentary time at a computer if it takes a very long time to learn and to perform these tasks.		As discussed above (in previous section) we were shown a recording of the presentation done previously to others at a remote (video conference) meeting. So my feedback is little uninformed	It is difficult to comment without physically trialing the system?			4
Q5Comment_EN	Please write your comments about learning here				The need to learn and retain knowledge is vital.	given the burden of health conditions and especially those that affect older adults such as copd and heart failure i would say that it is both too time consuming and perhaps unhealthy to encourage more sedentary time at a computer if it takes a very long time to learn and to perform these tasks.		As discussed above (in previous section) we were shown a recording of the presentation done previously to others at a remote (video conference) meeting. So my feedback is little uninformed	It is difficult to comment without physically trialing the system?			4
													5.56616
Q6.1	6.1 Quality of still pictures/photographs is			7	9	8		3	5	6	9	7	6.71429	2.21467	7
Q6.1.1	6.1.1 Pictures/Photos are			3	3	8		3	5	6	9	7	5.28571	2.49762	5
Q6.1.2	6.1.2 Picture/Photo brightness is	7		4	9	8		5	5	7		7	6.42857	1.81265	7
Q6.2	6.2 Colors used are	7		4	7	8		6	5	6	9	8	6.5	1.60357	6.5
Q6.2.1	6.2.1 Amount of colors available is	7		5	7	8		6	5	7	9	8	6.75	1.38873	7
Q6Comment	Please write your comments about multimedia here				Needs worked on to simply instructions.	colours fine but need to ensure colour blind people and those with neurodiversity are accomodated so no harsh black text upon bright white backgrounds etc.	The presentation did not demonstrate any of the above		Again, I cannot comment without having physically using the software.			4
Q6Comment_EN	Please write your comments about multimedia here				Needs worked on to simply instructions.	colours fine but need to ensure colour blind people and those with neurodiversity are accomodated so no harsh black text upon bright white backgrounds etc.	The presentation did not demonstrate any of the above		Again, I cannot comment without having physically using the software.			4
													6.33571
Q7.1	7.1 The training workshop or training video was			6	9	6	9	3	5	7	9	8	6.75	2.18763	6.5
Q7.2	7.2 The terminology used in the manual is			6	9	2		4	5	5	9	7	5.71429	2.56348	5
Q7.3	7.3 The information from the manual is easily understood			6	7	2		4	5			5	4.8	1.92354	5
Q7.4	7.4 Finding a solution to a problem using the manual is			5	8				5	6		4	6	1.41421	5.5
Q7.5	7.5 Amount of help given is		1	5			2		5	6		5	3.8	2.16795	5
Q7.6	7.6 Placement of help messages on the screen is			5	5	7	5		5	6		6	5.5	0.83666	5
Q7.7	7.7 Accessing help messages is			5					5	6		3	5.33333	0.57735	5
Q7Comment	Please write your comments about training material here				The need to be simplified.		How can I answer these questions without an online or f2f demo?	I (we) as the attendee did not get a chance to see this option of help screen or error	Didn't have access to training materials.			4
Q7Comment_EN	Please write your comments about training material here				The need to be simplified.		How can I answer these questions without an online or f2f demo?	I (we) as the attendee did not get a chance to see this option of help screen or error	Didn't have access to training materials.			4
													5.41395
Q8.1	8.1 System speed is			6	9	8		6	5	7	9	7	7.14286	1.57359	7
Q8.1.1	8.1.1 Response time for most operations is			5	6	8		6	5	7		6	6.16667	1.16905	6
Q8.2	8.2 The system is reliable			6	9	8			5	6		5	6.8	1.64317	6
Q8.2.1	8.2.1 System failures occur				6				5	6		3	5.66667	0.57735	6
Q8.2.2	8.2.2 The system warns you about potential problems				9				5	5		3	6.33333	2.3094	5
Q8.3	8.3 Correcting your mistakes is				6				5	5		3	5.33333	0.57735	5
Q8.3.1	8.3.1 Correcting typos is				1				5	7		3	4.33333	3.05505	5
Q8.3.2	8.3.2 Ability to undo operations is				5				5	5		3	5	0	5
Q8.4	8.4 The ease of operation depends on my level of experience			5	9	7		9	5	7	9	7	7.28571	1.79947	7
Q8.4.1	8.4.1 I can accomplish tasks knowing only a few commands			5	1			1	5	5		5	3.4	2.19089	5
Q8Comment	Please write your comments about system capabilities here				Fairly easy and straightforward.	this is something which would be best tracked over time to see if pts improve once they get used to the system	How can I respond here until I have been given a beta system to consider?	My response and comments above are based on the presentation given to us at a video conference workshop. I don't know if I would have been able to use the system as effectively as the expert who did the presentation to us. It might be helpful for us to trial this tool ourself physically	unable to comment without using a trial version.			5
Q8Comment_EN	Please write your comments about system capabilities here				Fairly easy and straightforward.	this is something which would be best tracked over time to see if pts improve once they get used to the system	How can I respond here until I have been given a beta system to consider?	My response and comments above are based on the presentation given to us at a video conference workshop. I don't know if I would have been able to use the system as effectively as the expert who did the presentation to us. It might be helpful for us to trial this tool ourself physically	unable to comment without using a trial version.			5
													5.74619
Q9	9. Your opinion matters. Please leave either a general or a specific comment below if you would like to. If you are concerned about certain sections, just mention their number as a reference point.	I would not have found this app useful when looking after my elderly, frail father for over ten years and nor would he. He had multiple co-morbidities and we would not have been able to use the app. He had severe osteo-arthritis in both hands and was registered blind. Moreover we didn't have a computer or a smart phone.	A lot of this I was unable to give answers to because I have not seen what is being referred to during the online presentation. My concerns would be data protection, feedback to GP affecting my application for benefits (if my messages are misinterpreted from the app and I'm deemed to be well), how the app will know about my appointments and who will be inputting this information, how will people …	It would have been useful to have access to ADLIFE for a week or so to road test it's user ability/function and then to undertake this rating which I'm sure I may have scored it higher as I became more familiar with its function, Personally ADLIFE in my opinion would have benefit from more involvement of Patient, Public and Carers in personally testing the functions of ADLIFE rather than the demo…	Overall very good idea downfall as the elderly population prefer things in black and white. My concern is getting these minority to be educated in accessing information is a key,	i have a few concerns which are: 1. encouraging sedentary behaviour in those whose health would be harmed by it 2. concern over privacy and security of the site - who can see it and information being disclosed to third parties eg insurers, benefits agencies, employers etc 3. the detection in real time of emergencies and serious health concerns the ability to spot them in time and deal with them 4…	I am concerned that I cannot answer many of the survey questions becuase I have not had a more comprehensive demonstration or interactive meeting with the ADlLIFE tool being developed. Nevertheless, I am really interested in this tool and the potential for empowering me as a carer, and the person for whom I care, to better manage the condition and comorbidites with co-ordinating information and o…	I don't believe (think) these questions asked in this questionnaire are relevant to us (the attendees) at the Remote (Video Conference) meeting / workshop we attended. Questions are being asked about the use of the system when it will be more appropriate to ask on if we understood on what the system is trying to do and what potential benefits or not it may be able to deliver to us. Do we think su…	Without having access to a trial version of the software it is difficult to provide any practical input? I would suggest a 'trial' version be made available and would also suggest that if this were available that contacting the European Lung Foundation to trial the software through it's patient advisory groups - many of whom can provide condition specific feedback? Courtney Coleman heads up the E…	In general Adlife provides a reasonable method of communication between user and health care provider. However, we (the patient and the carer) found the ease of use of the tool highly dependent upon an existent level of competence in using such technology.		9
Q9_EN	9. Your opinion matters. Please leave either a general or a specific comment below if you would like to. If you are concerned about certain sections, just mention their number as a reference point.	I would not have found this app useful when looking after my elderly, frail father for over ten years and nor would he. He had multiple co-morbidities and we would not have been able to use the app. He had severe osteo-arthritis in both hands and was registered blind. Moreover we didn't have a computer or a smart phone.	A lot of this I was unable to give answers to because I have not seen what is being referred to during the online presentation. My concerns would be data protection, feedback to GP affecting my application for benefits (if my messages are misinterpreted from the app and I'm deemed to be well), how the app will know about my appointments and who will be inputting this information, how will people …	It would have been useful to have access to ADLIFE for a week or so to road test it's user ability/function and then to undertake this rating which I'm sure I may have scored it higher as I became more familiar with its function, Personally ADLIFE in my opinion would have benefit from more involvement of Patient, Public and Carers in personally testing the functions of ADLIFE rather than the demo…	Overall very good idea downfall as the elderly population prefer things in black and white. My concern is getting these minority to be educated in accessing information is a key,	i have a few concerns which are: 1. encouraging sedentary behaviour in those whose health would be harmed by it 2. concern over privacy and security of the site - who can see it and information being disclosed to third parties eg insurers, benefits agencies, employers etc 3. the detection in real time of emergencies and serious health concerns the ability to spot them in time and deal with them 4…	I am concerned that I cannot answer many of the survey questions becuase I have not had a more comprehensive demonstration or interactive meeting with the ADlLIFE tool being developed. Nevertheless, I am really interested in this tool and the potential for empowering me as a carer, and the person for whom I care, to better manage the condition and comorbidites with co-ordinating information and o…	I don't believe (think) these questions asked in this questionnaire are relevant to us (the attendees) at the Remote (Video Conference) meeting / workshop we attended. Questions are being asked about the use of the system when it will be more appropriate to ask on if we understood on what the system is trying to do and what potential benefits or not it may be able to deliver to us. Do we think su…	Without having access to a trial version of the software it is difficult to provide any practical input? I would suggest a 'trial' version be made available and would also suggest that if this were available that contacting the European Lung Foundation to trial the software through it's patient advisory groups - many of whom can provide condition specific feedback? Courtney Coleman heads up the E…	In general Adlife provides a reasonable method of communication between user and health care provider. However, we (the patient and the carer) found the ease of use of the tool highly dependent upon an existent level of competence in using such technology.		9
